# Supplementary material for: Synthesis, Biological Evaluation and Computational Studies of New Hydrazide Derivatives Containing 1,3,4-Oxadiazole as Antitubercular Agents
Source: MDPI journal article supplement (doi:10.3390/ijms232315295), 2022-12-04
Supplement: s1 [file s1]

## **Supporting Information**

### **Synthesis, biological evaluation and computational studies of new hydrazide derivatives containing 1,3,4-oxadiazole as antitubercular agents**

Daniele Zampieri<sup>1\*</sup>, Sara Fortuna<sup>2</sup>, Maurizio Romano<sup>3</sup>, Alessandro De Logu<sup>4</sup>, Gianluigi Cabiddu<sup>4</sup>, Adriana Sanna<sup>5</sup> and Maria Grazia Mamolo<sup>1</sup>

<sup>1</sup>*Department of Chemistry and Pharmaceutical Sciences, Piazzale Europa 1, University of Trieste, 34127 Trieste, Italy.*

<sup>2</sup>*Italian Institute of Technology (IIT), Via E. Melen, 83, I-16152 Genova, Italy.*

<sup>3</sup>*Department of Life Sciences, Via Valerio 28/1, University of Trieste, 34127 Trieste, Italy*

<sup>4</sup>*Department of Life and Environmental Sciences, University of Cagliari, Cittadella Universitaria di Monserrato, 09042, Monserrato (Cagliari), Italy.*

<sup>5</sup>*Department of Public Health, Clinical and Molecular Medicine, University of Cagliari Cittadella Universitaria di Monserrato, 09042, Monserrato (Cagliari), Italy.*

\*Correspondance: dzampieri@units.it

#### Table of Contents

##### 1. Experimental data

|                      |         |
|----------------------|---------|
| - Spectral data      | page 2  |
| - Cytotoxicity study | page 20 |

# NMR Spectra

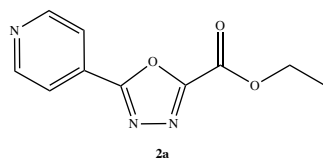

Solvent: CDCl<sub>3</sub>

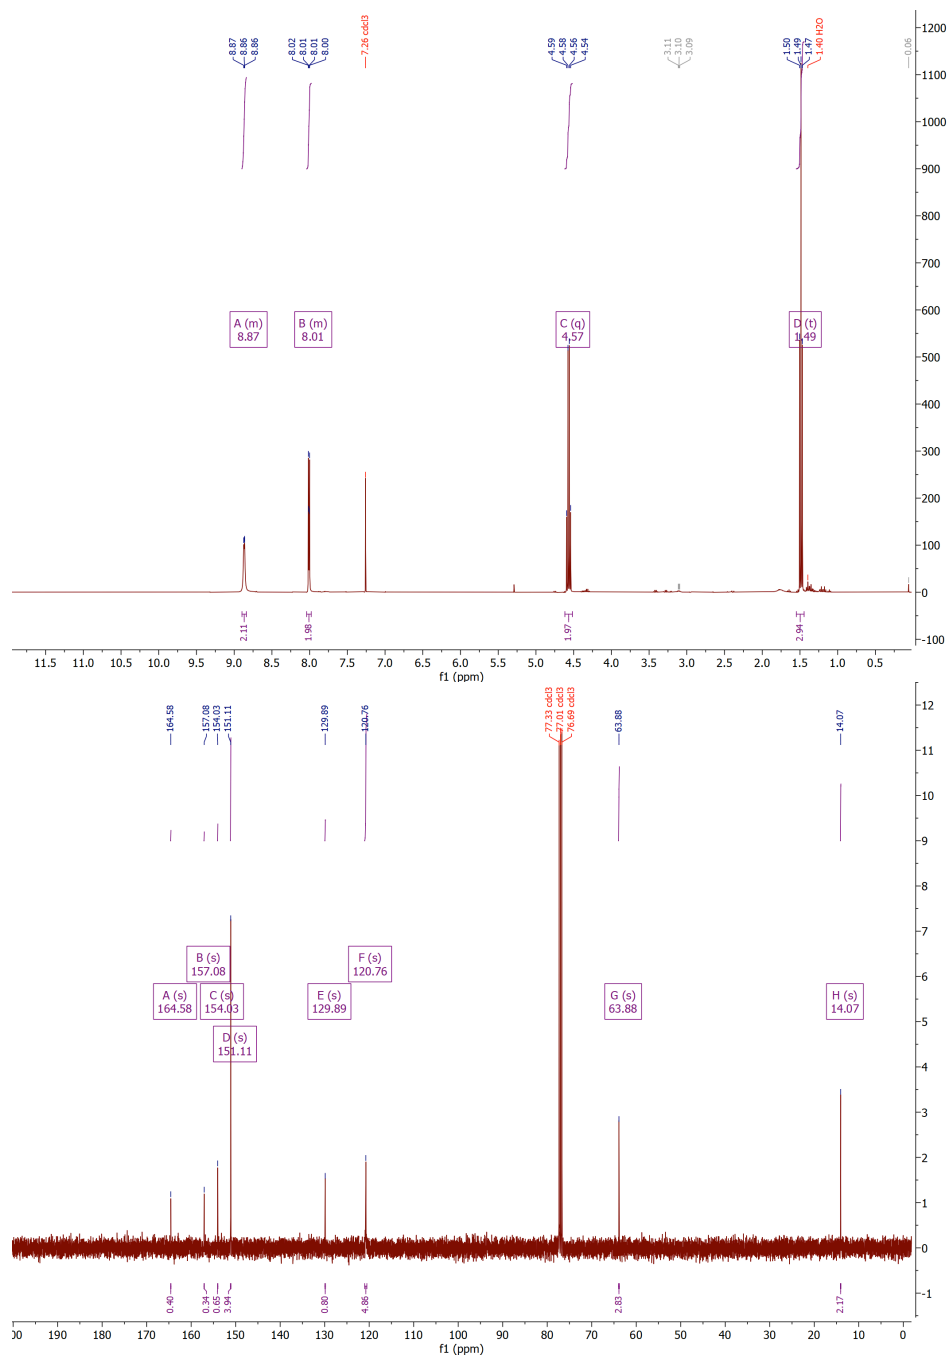

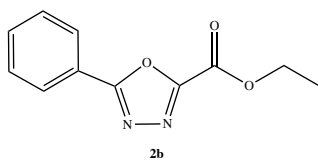

Solvent: CDCl<sub>3</sub>

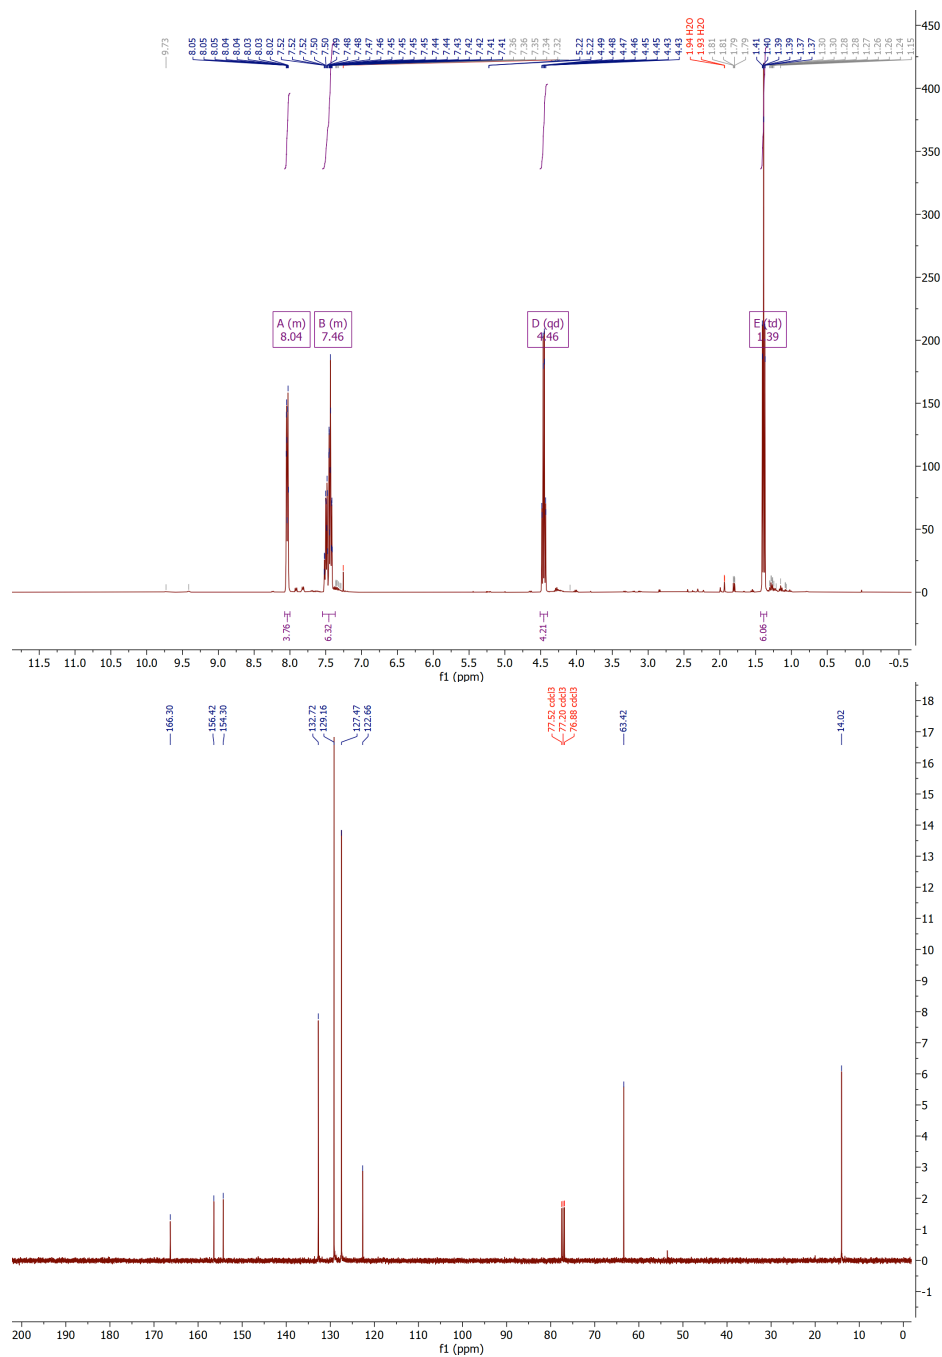

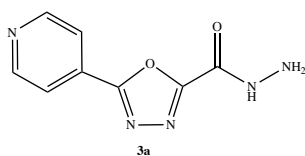

Solvent: DMSO-d<sub>6</sub>

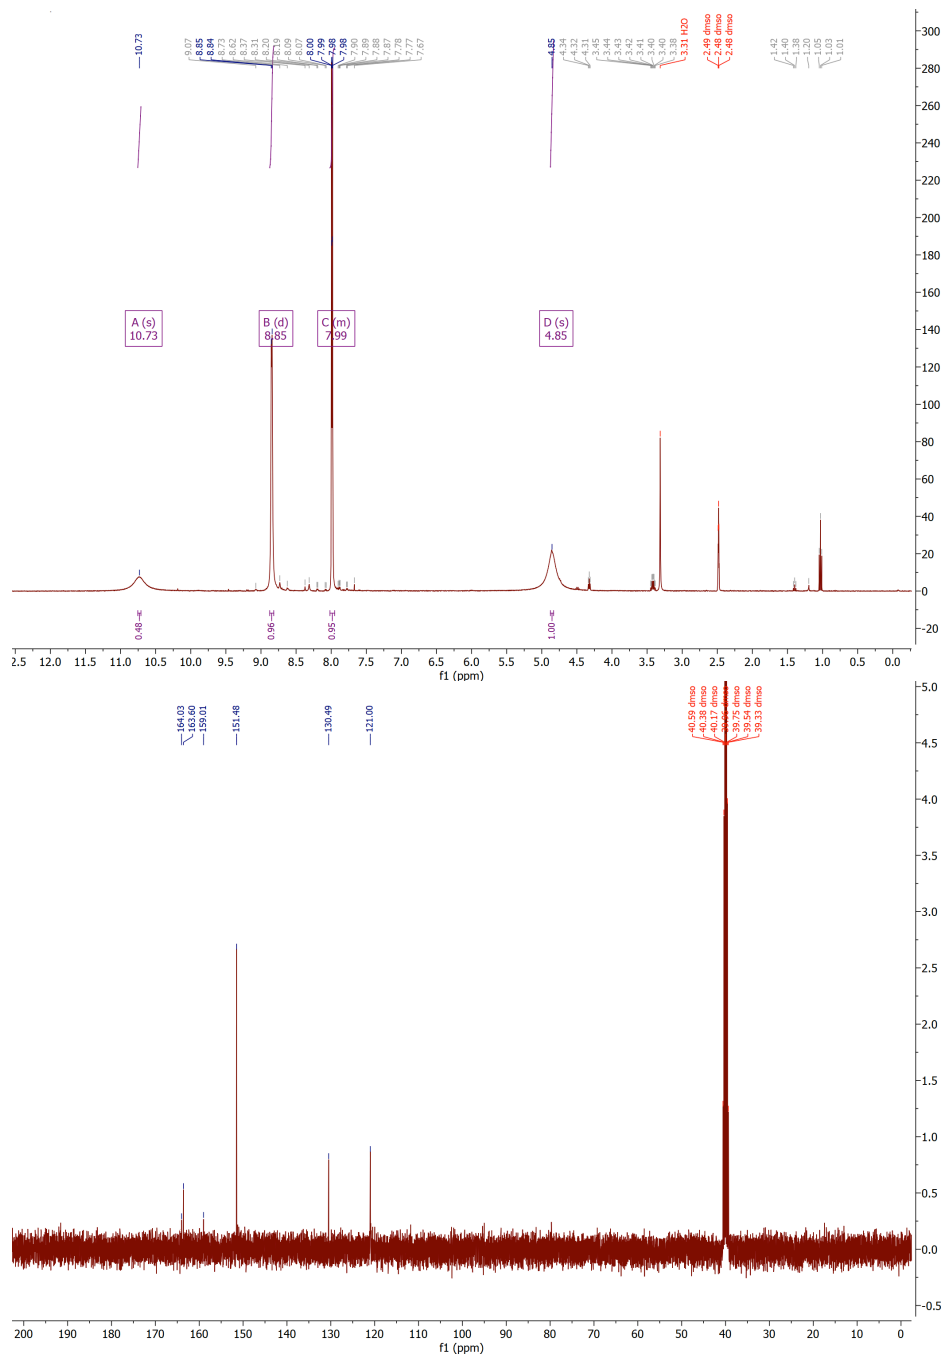

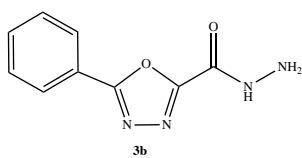

Solvent: DMSO-d<sub>6</sub>

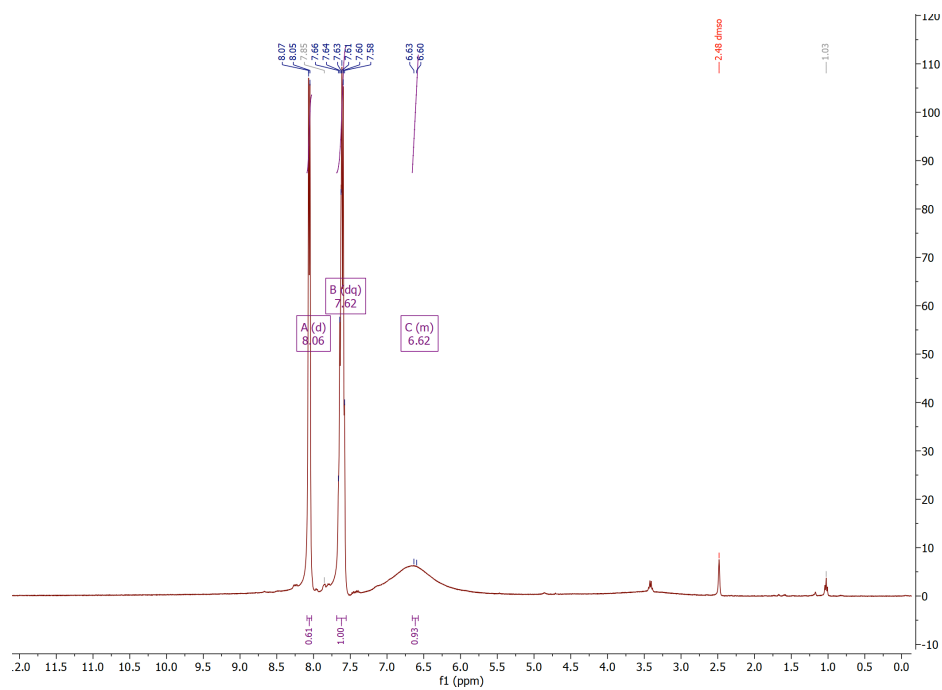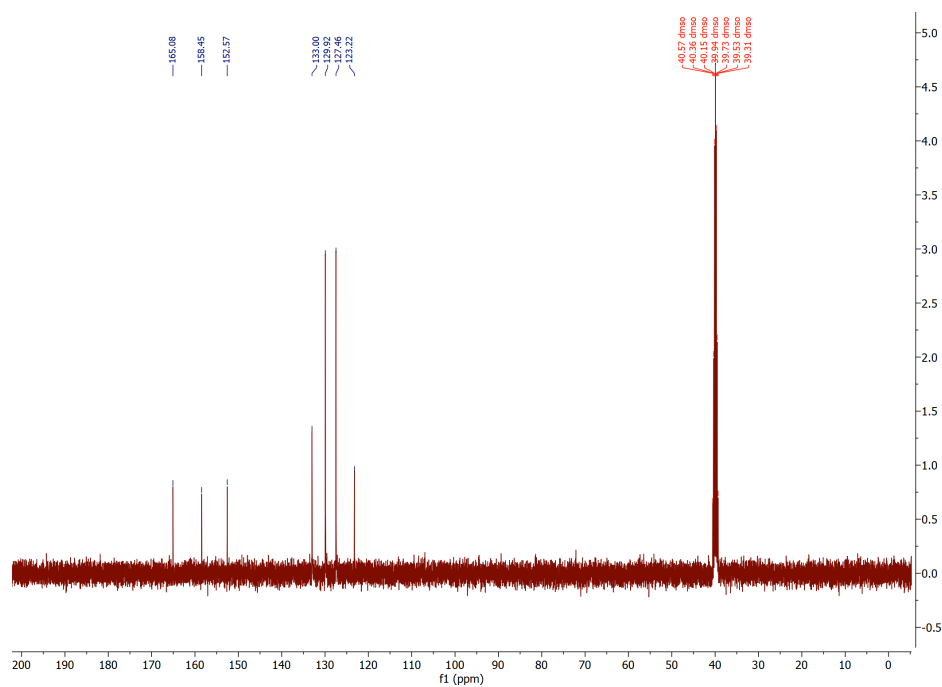

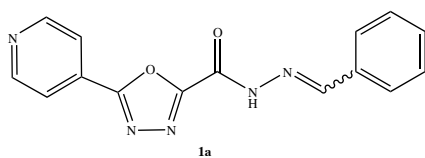

Solvent: DMSO-d<sub>6</sub>

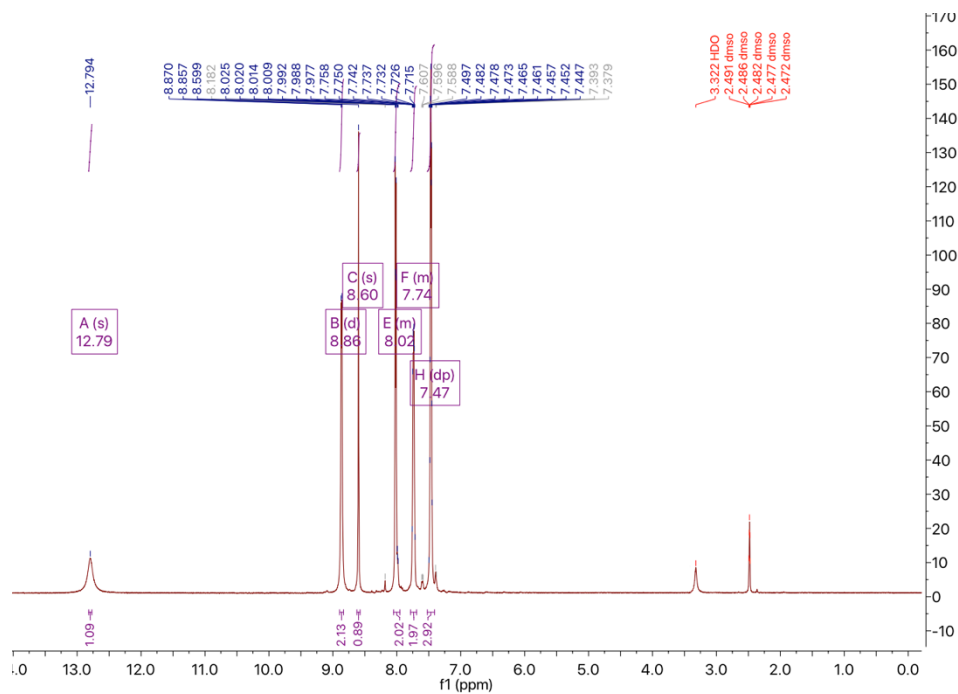

Solvent: DMSO-d<sub>6</sub>

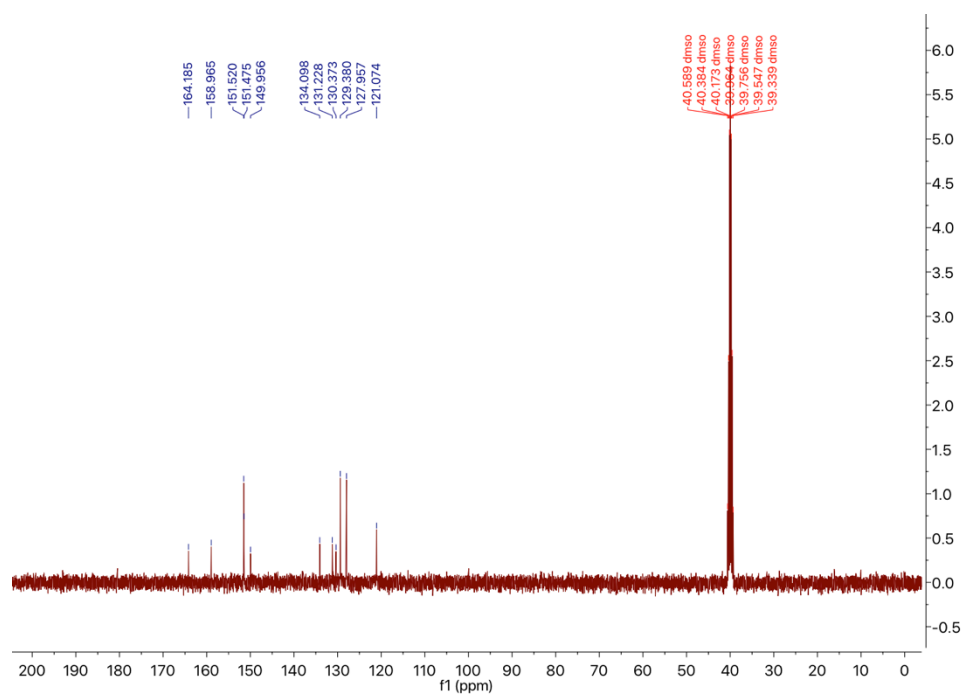

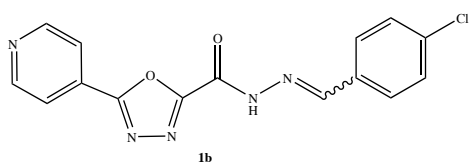

Solvent: DMSO-d<sub>6</sub>

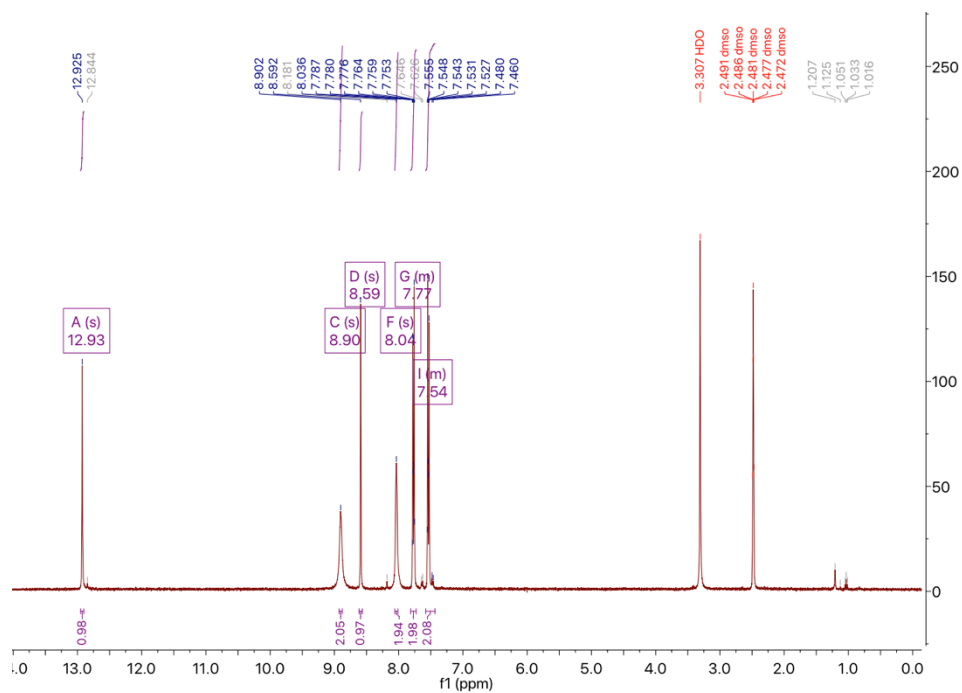

Solvent: C<sub>5</sub>D<sub>5</sub>N

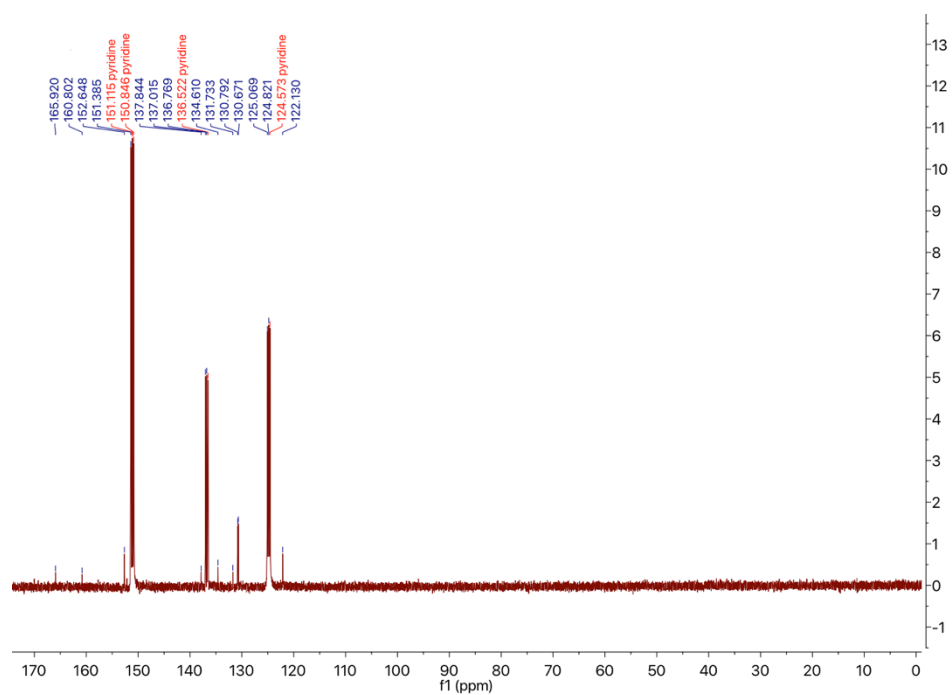

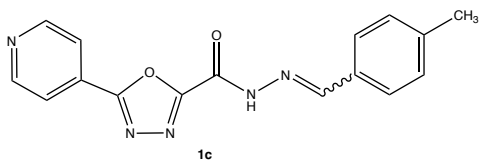

Solvent: CDCl<sub>3</sub>

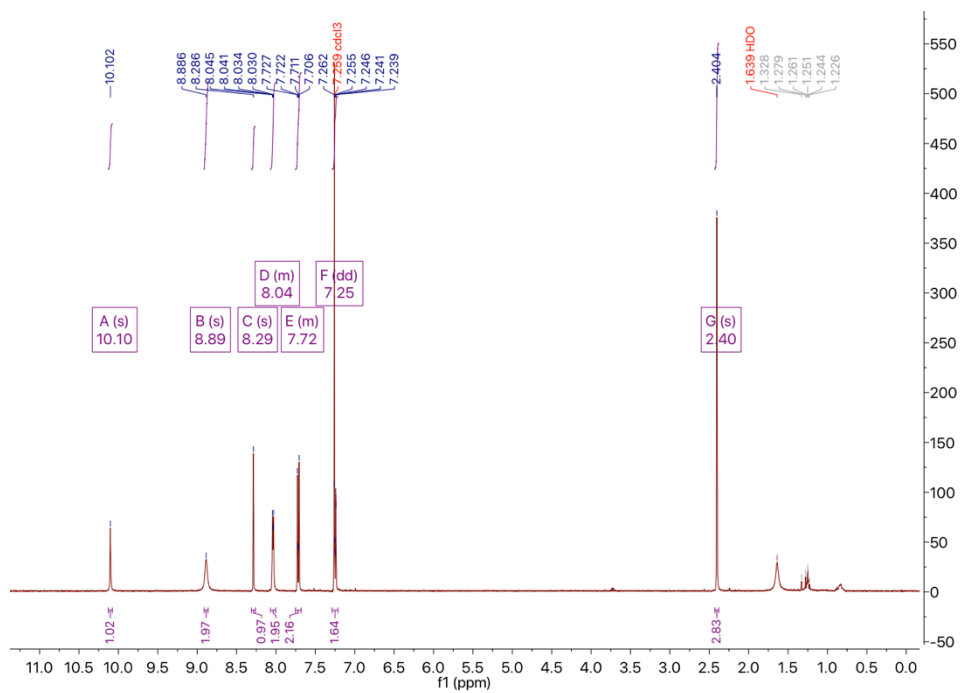

Solvent: CDCl<sub>3</sub>

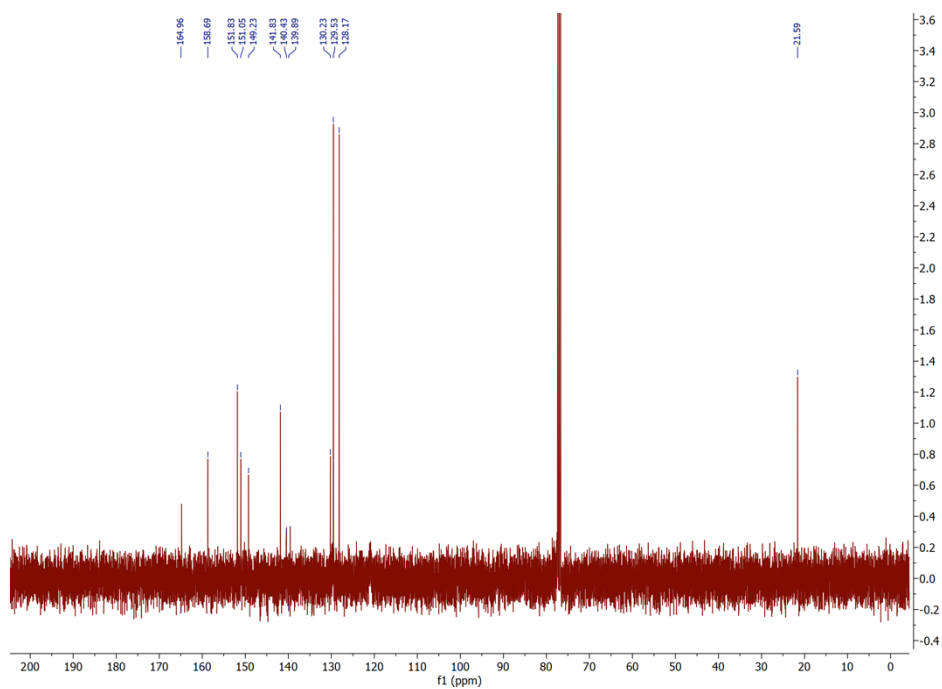



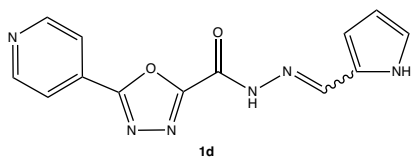

Solvent: DMSO-d<sub>6</sub>

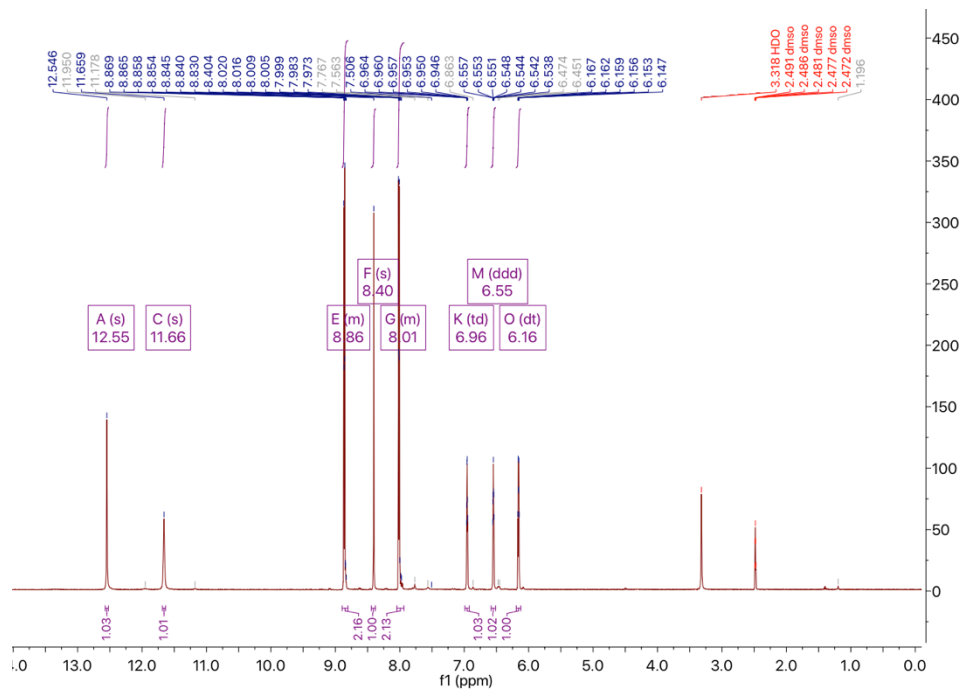

Solvent: DMSO-d<sub>6</sub>

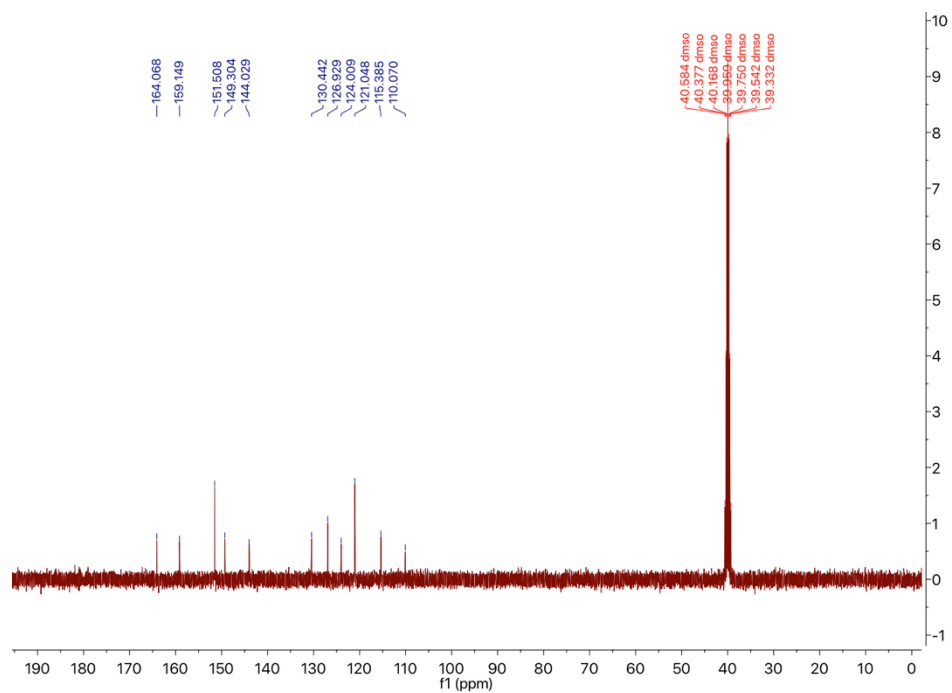

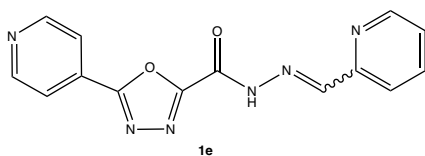

Solvent: DMSO-d6

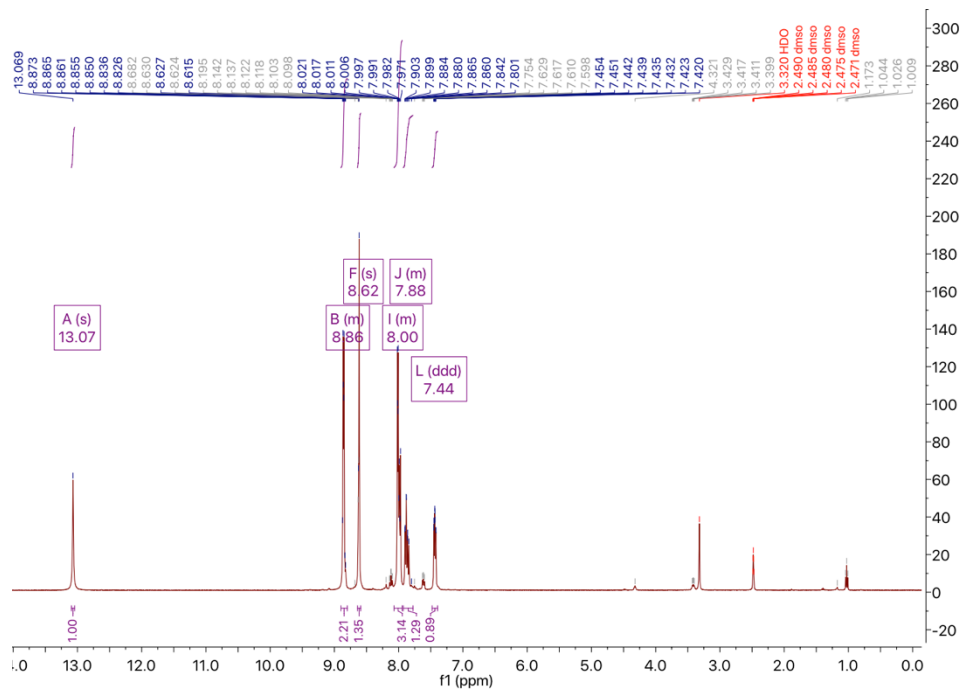

Solvent: DMSO-d6

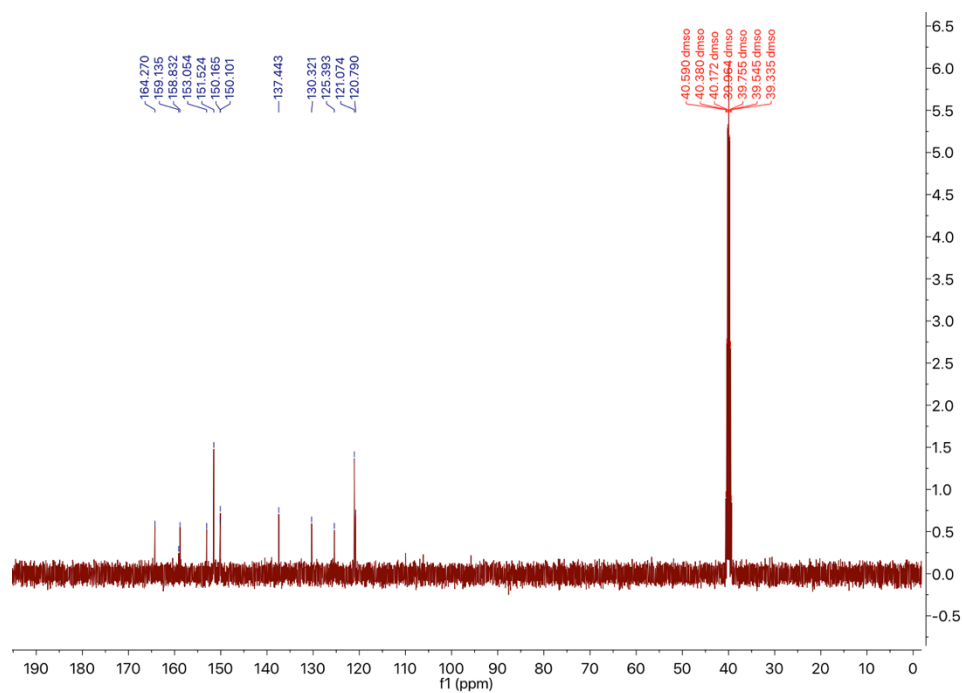

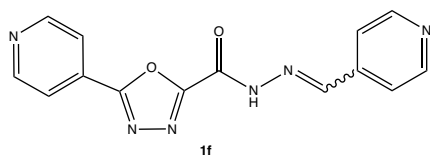

Solvent: DMSO-d6

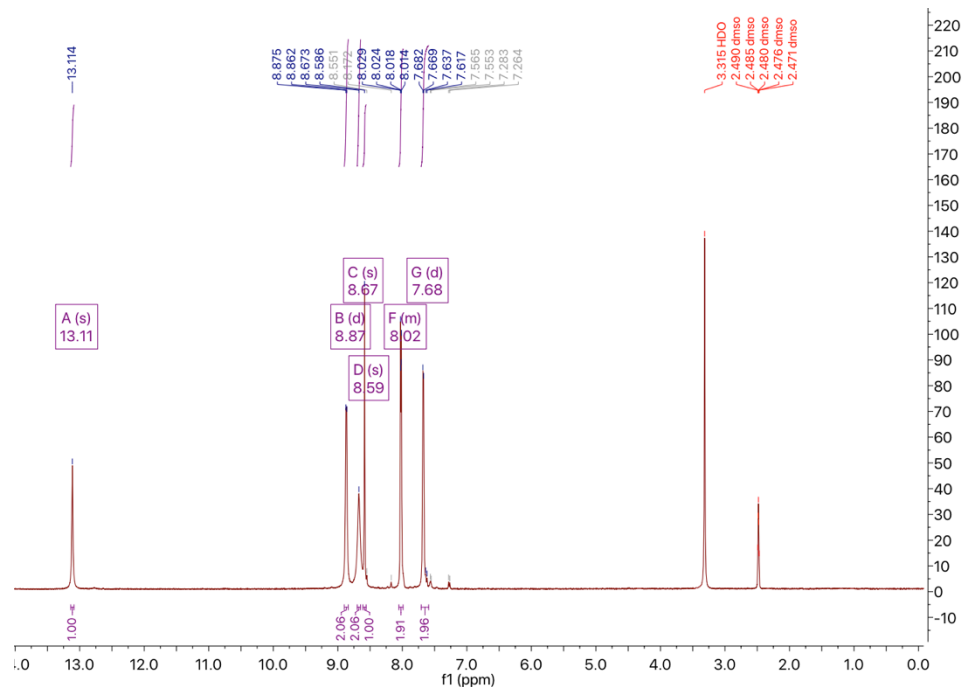

Solvent: DMSO-d6

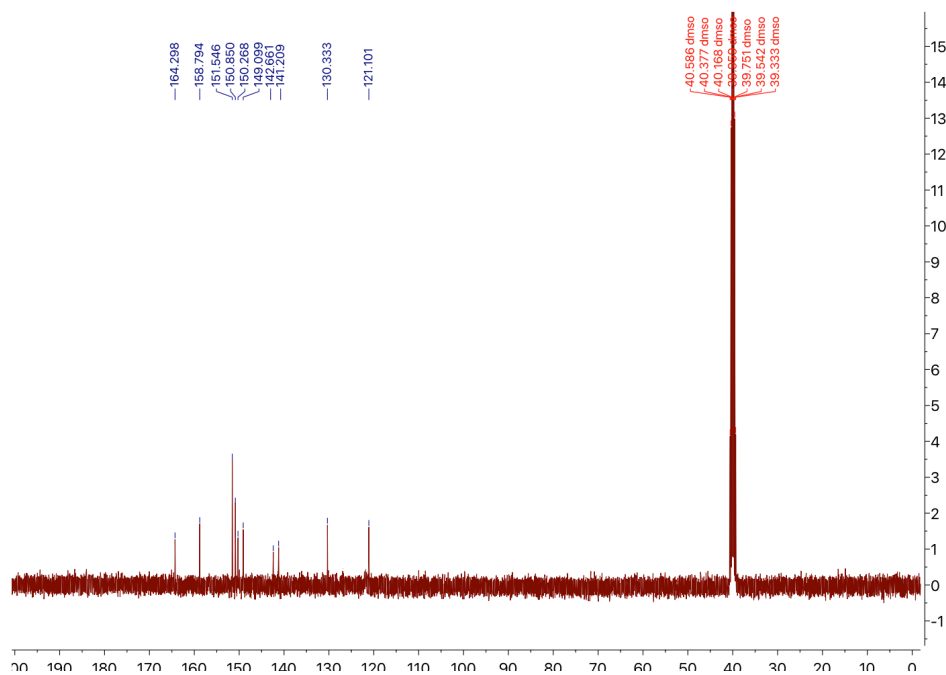

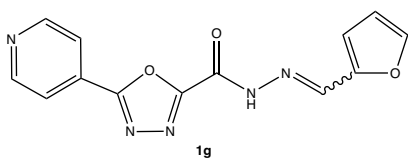

Solvent: DMSO-d<sub>6</sub>

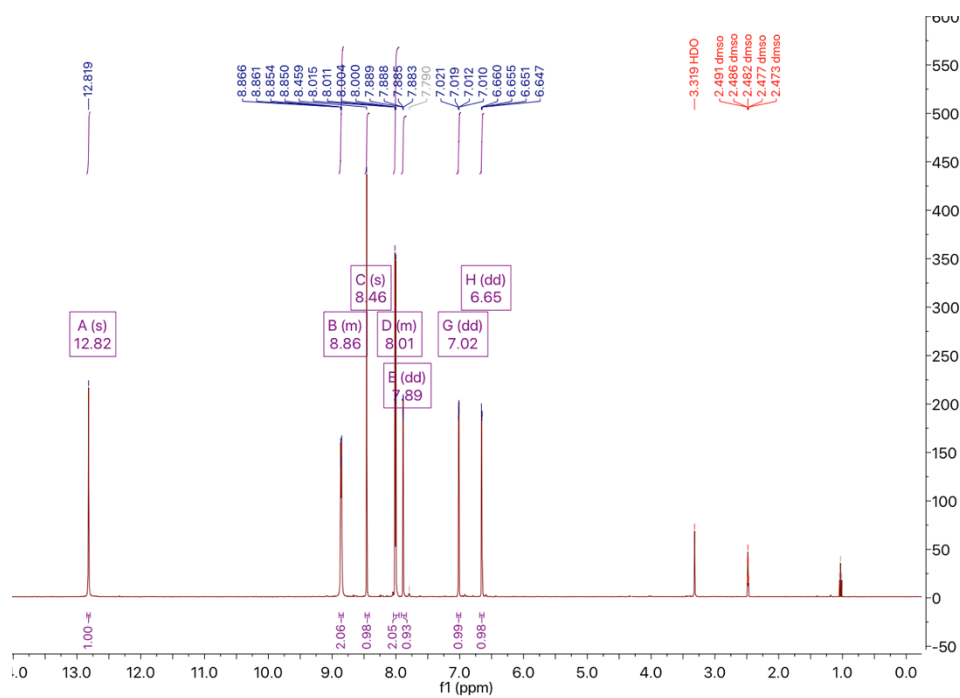

Solvent: DMSO-d<sub>6</sub>

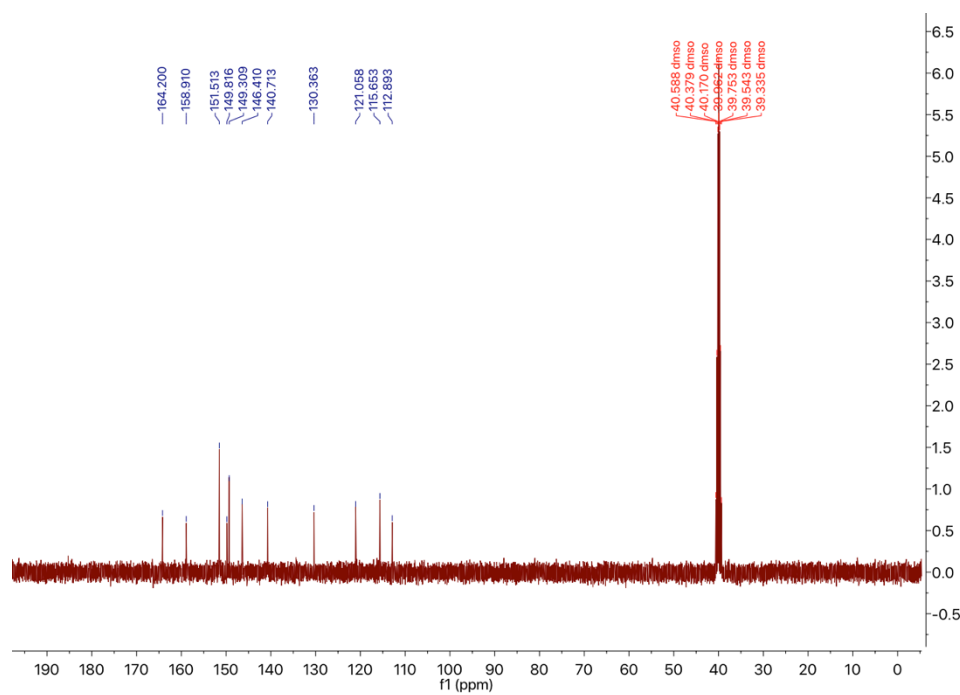

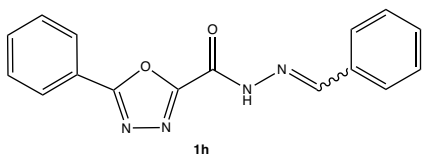

Solvent: DMSO-d6

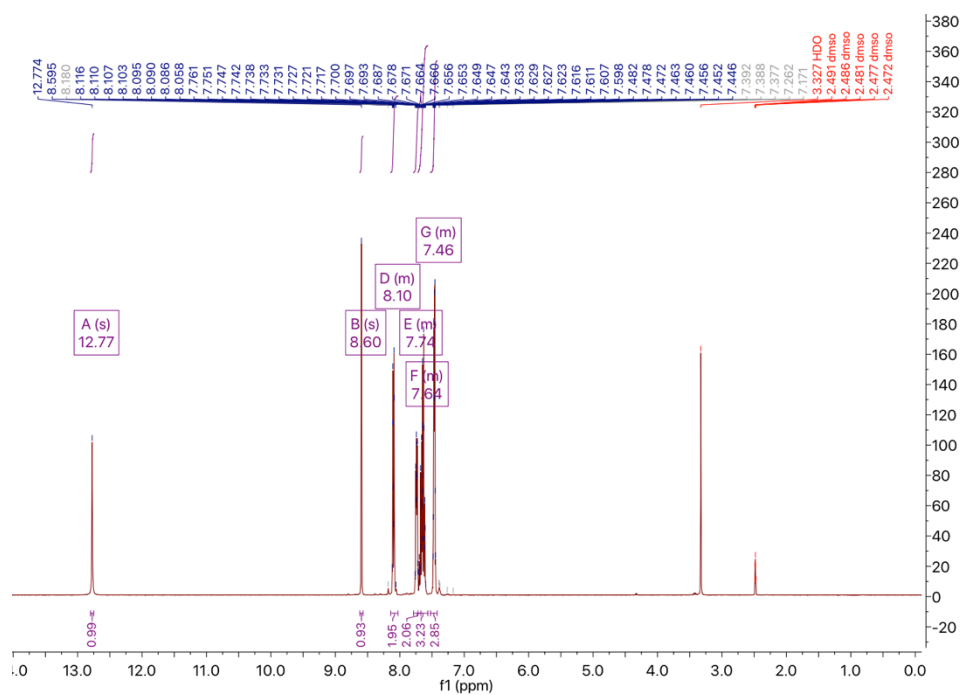

Solvent: DMSO-d6

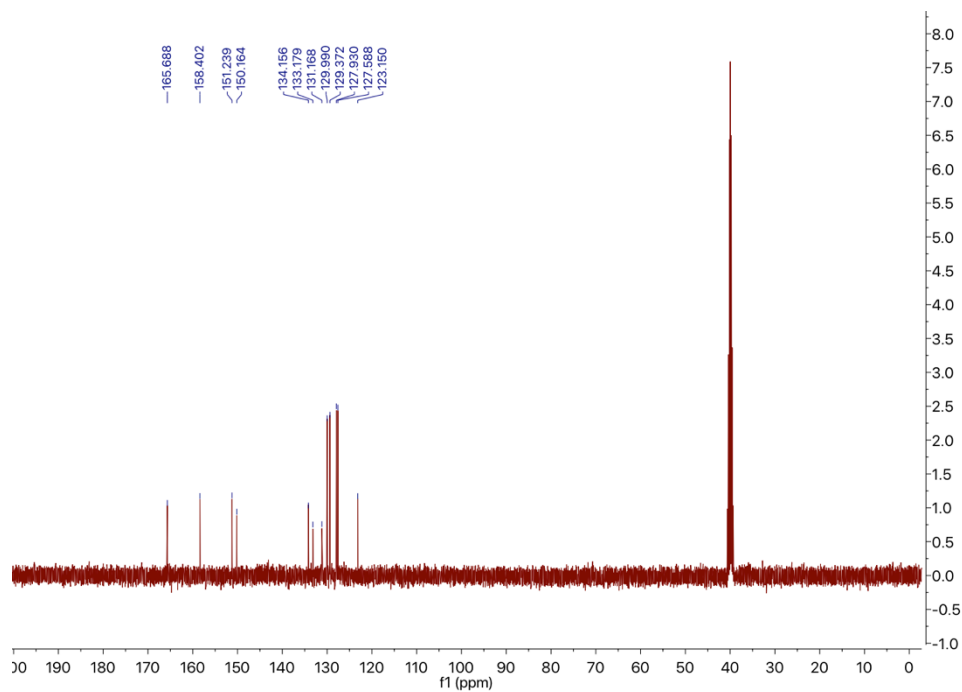

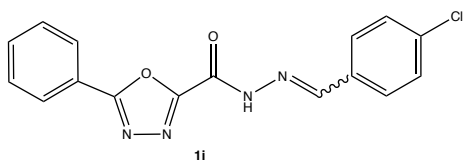

Solvent: DMF-d7

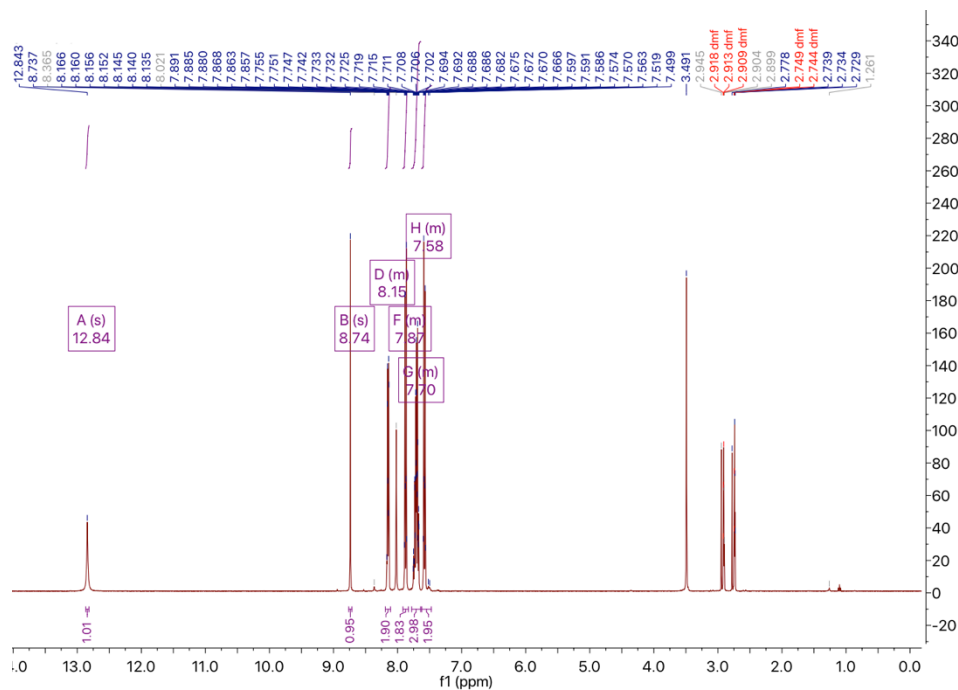

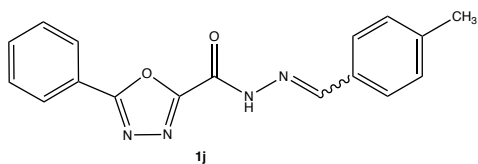

Solvent: DMSO-d<sub>6</sub>

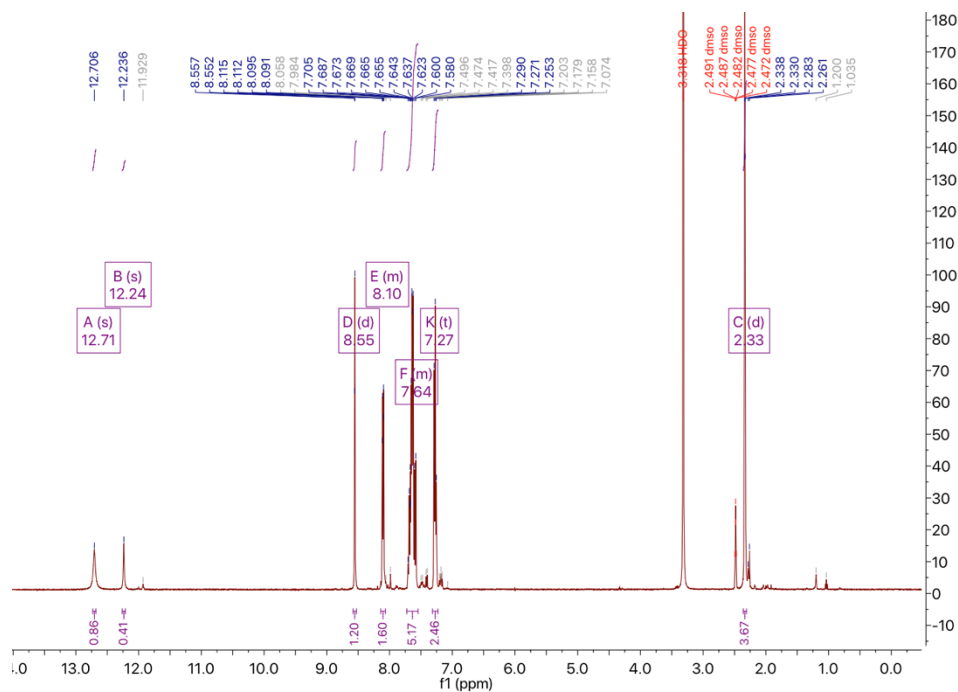

Solvent: DMSO-d<sub>6</sub>

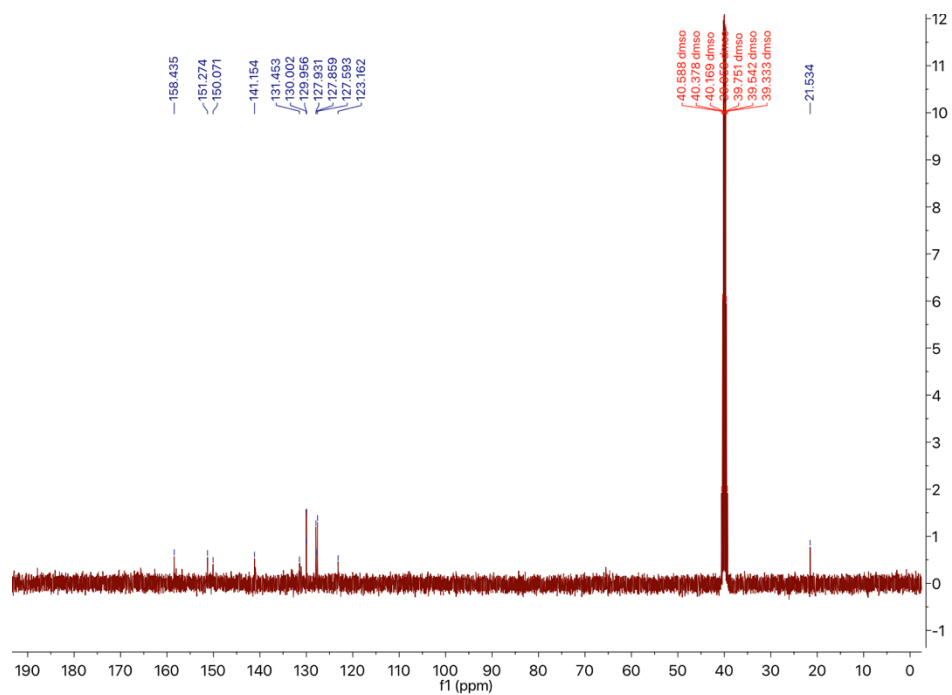

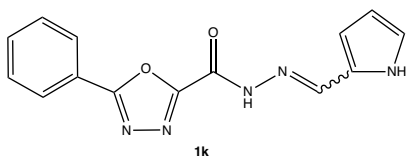

Solvent: DMSO-d<sub>6</sub>

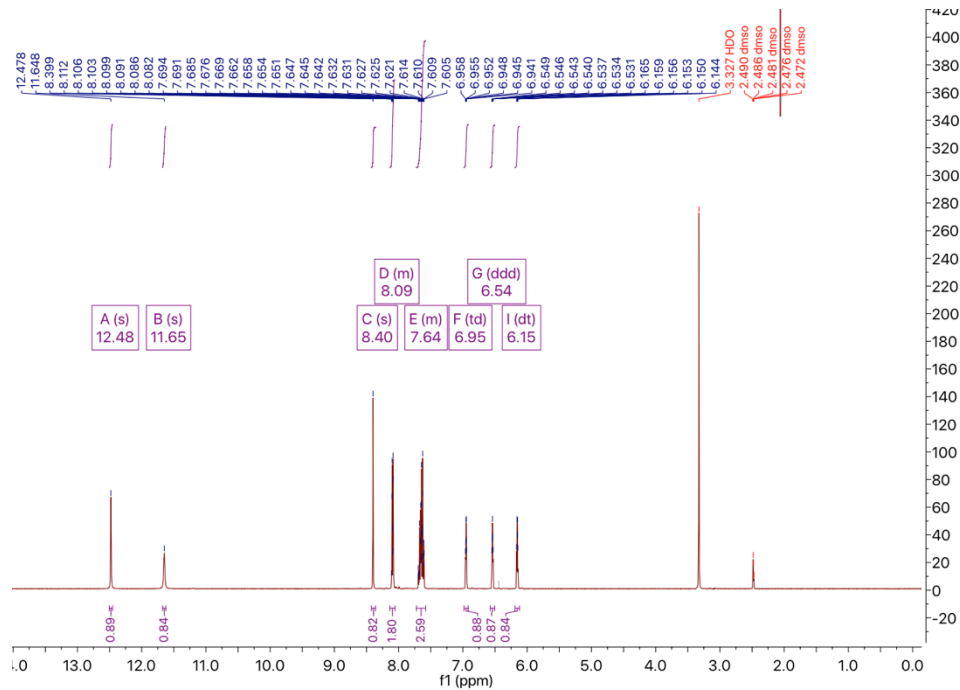



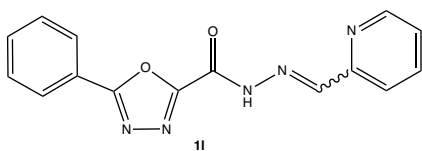

Solvent: DMSO-d<sub>6</sub>

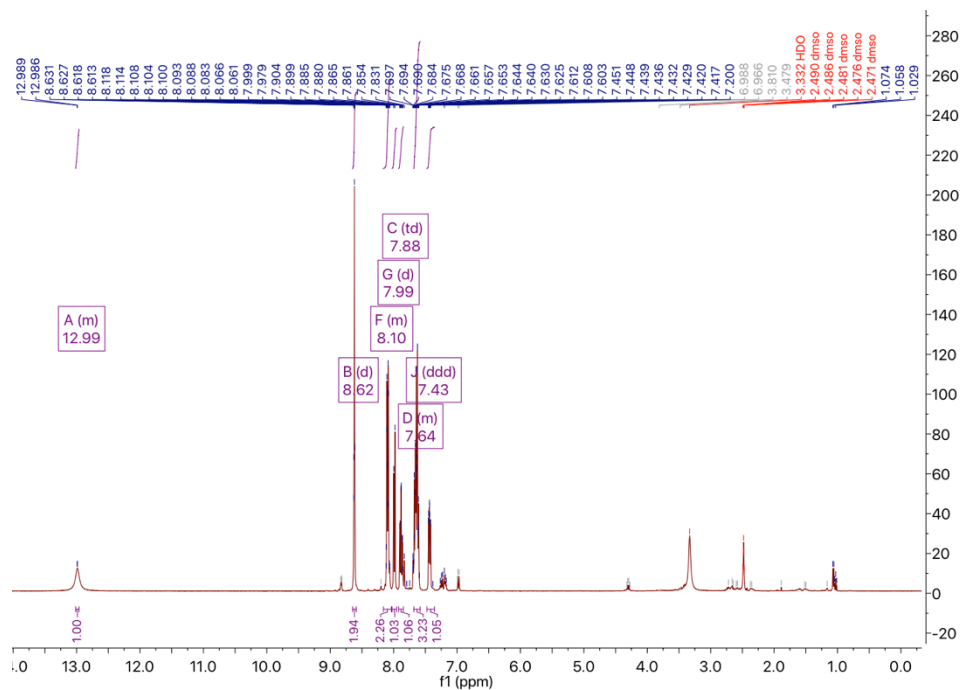

Solvent: DMSO-d<sub>6</sub>

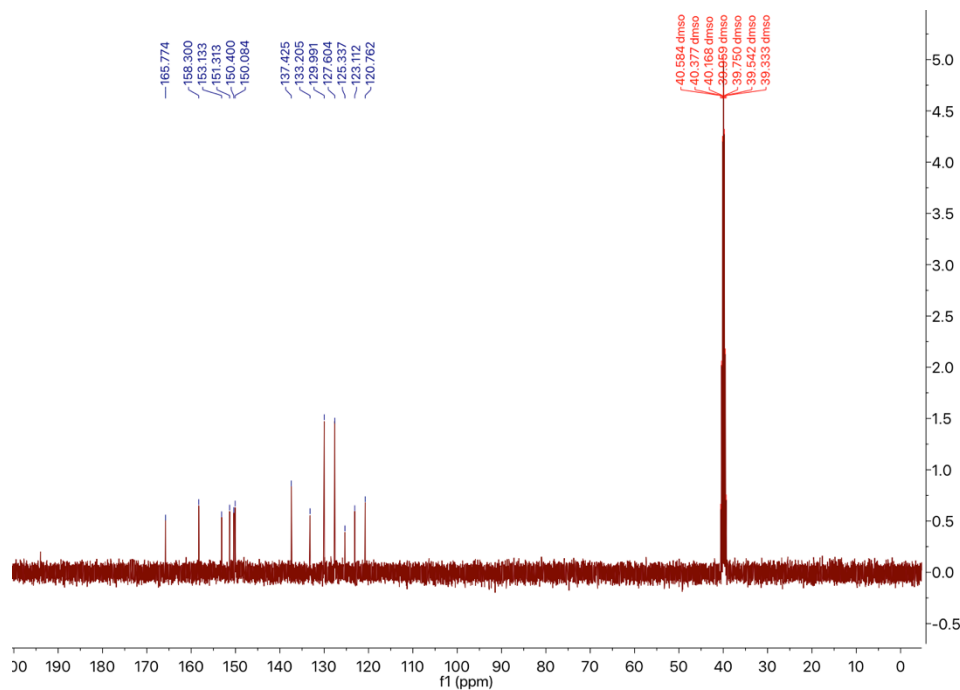

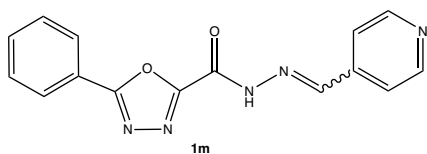

Solvent: DMSO-d<sub>6</sub>

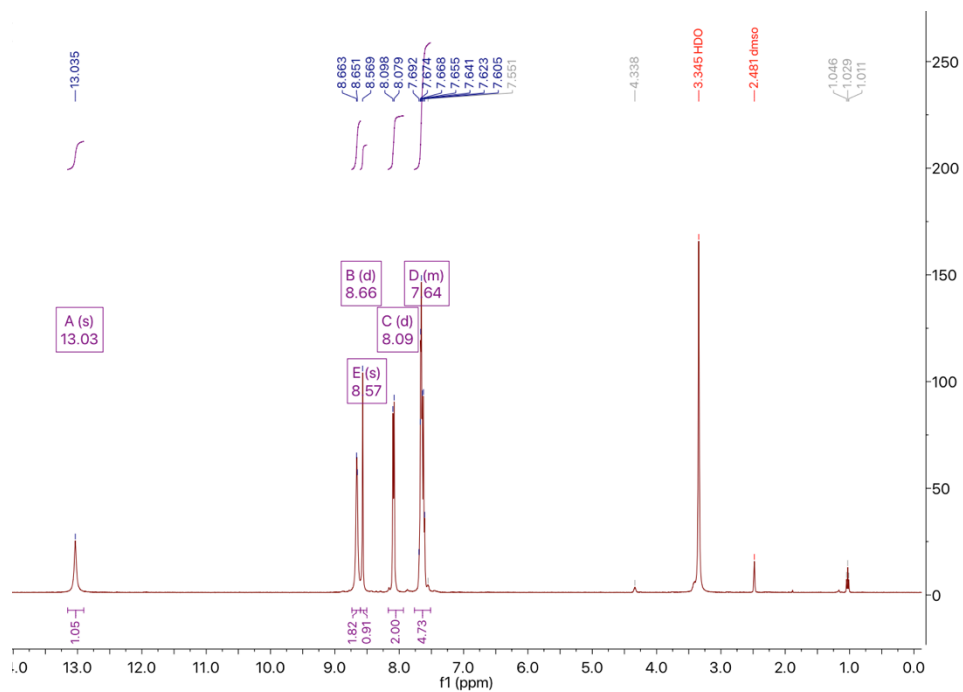

Solvent: DMSO-d<sub>6</sub>

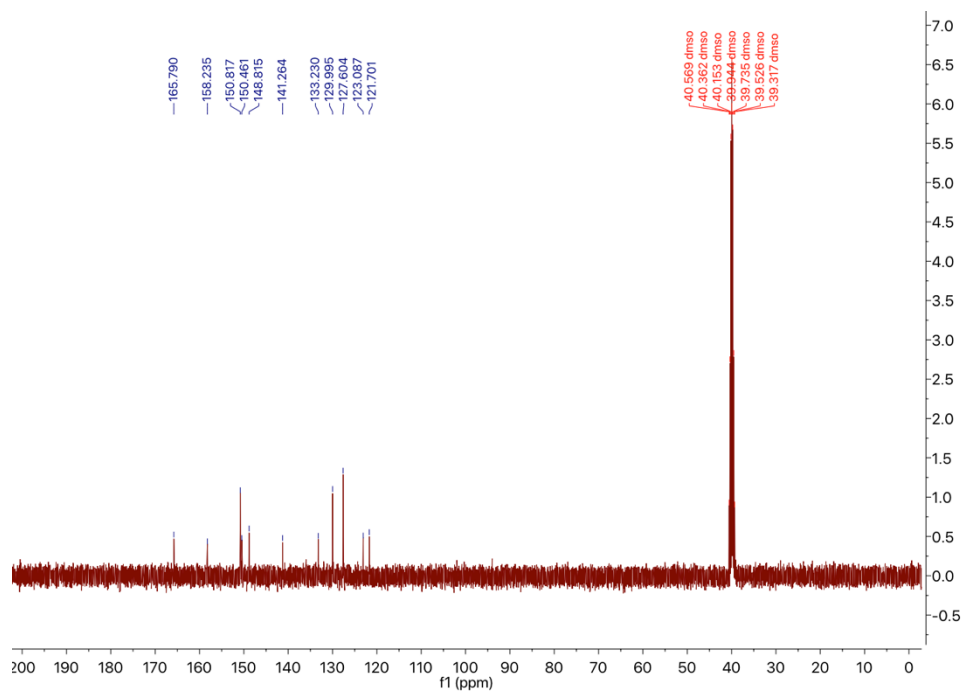

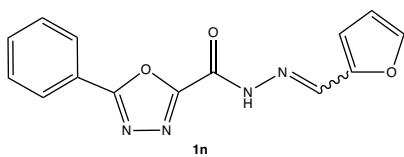

Solvent: DMSO-d6

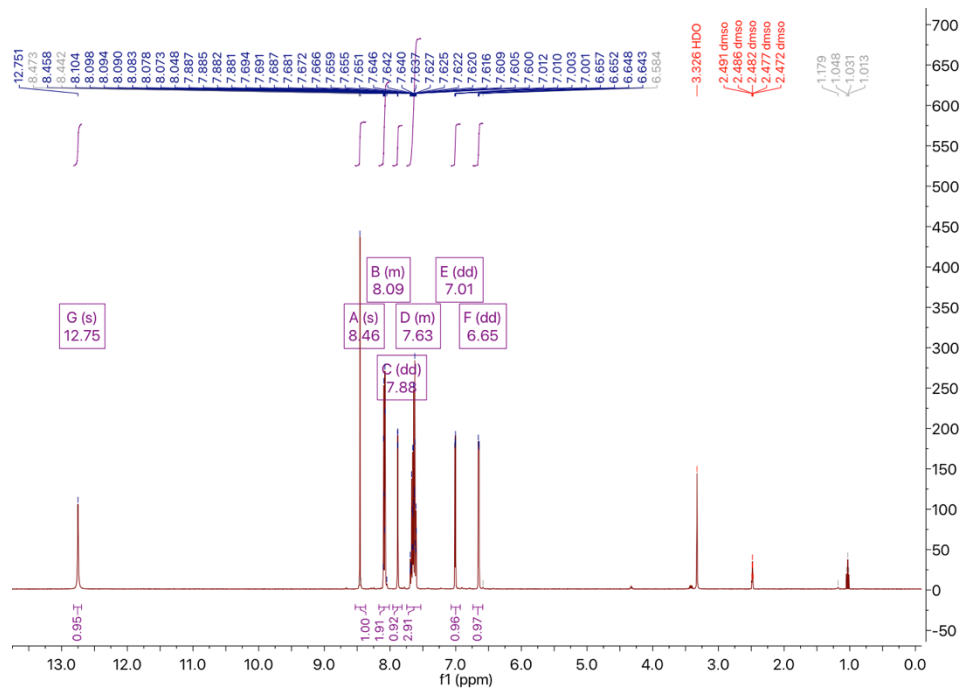

Solvent: DMSO-d6

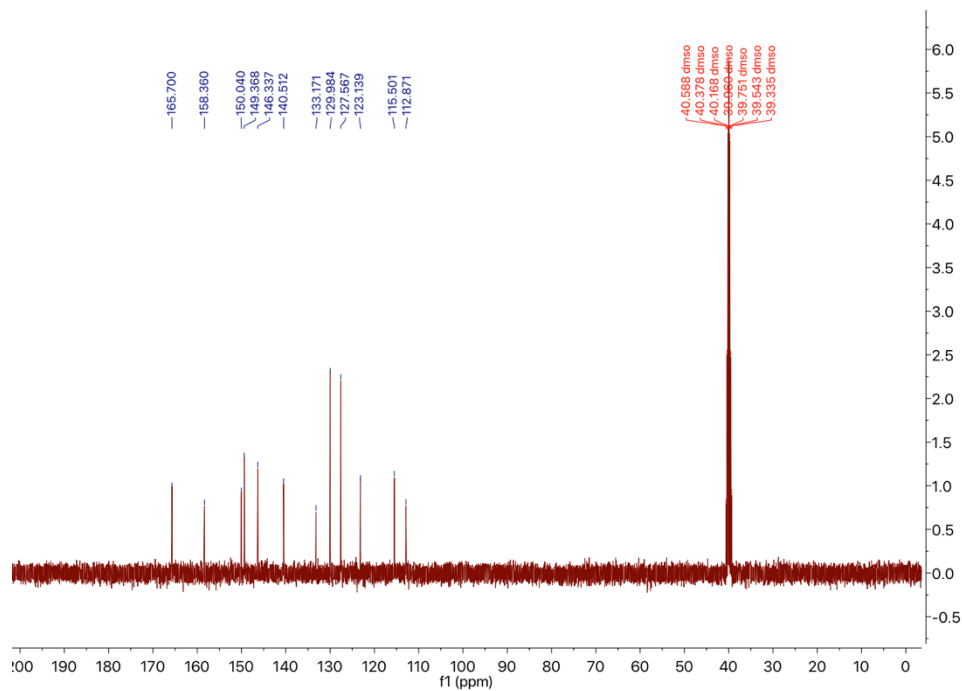

## Cytotoxicity study (additional information)

**Table S1:** Percent of viability for compounds **1h**, **1k–n** vs DMSO in SH-SY5Y cell line.

The human neuroblastoma cell line SH-SY5Y was treated with 6 different concentrations of the indicated compounds as described in the paragraph 4.2.4. of the main text. Data represent average values  $\pm$  SEM for triplicate measurements from two independent experiments.

| Conc ( $\mu$ M) | Viability (%) |              |              |              |              |
|-----------------|---------------|--------------|--------------|--------------|--------------|
|                 | <b>1h</b>     | <b>1k</b>    | <b>1l</b>    | <b>1m</b>    | <b>1n</b>    |
| 100             | 97 $\pm$ 12   | 37 $\pm$ 6   | 49 $\pm$ 7   | 61 $\pm$ 9   | 97 $\pm$ 11  |
| 50              | 100 $\pm$ 14  | 49 $\pm$ 7   | 70 $\pm$ 10  | 87 $\pm$ 11  | 100 $\pm$ 13 |
| 25              | 99 $\pm$ 15   | 81 $\pm$ 12  | 93 $\pm$ 13  | 96 $\pm$ 14  | 100 $\pm$ 12 |
| 12.5            | 99 $\pm$ 11   | 101 $\pm$ 14 | 98 $\pm$ 13  | 98 $\pm$ 16  | 99 $\pm$ 15  |
| 6.25            | 99 $\pm$ 13   | 100 $\pm$ 13 | 100 $\pm$ 12 | 100 $\pm$ 14 | 100 $\pm$ 11 |
| 3.125           | 100 $\pm$ 13  | 100 $\pm$ 13 | 100 $\pm$ 12 | 100 $\pm$ 14 | 100 $\pm$ 11 |

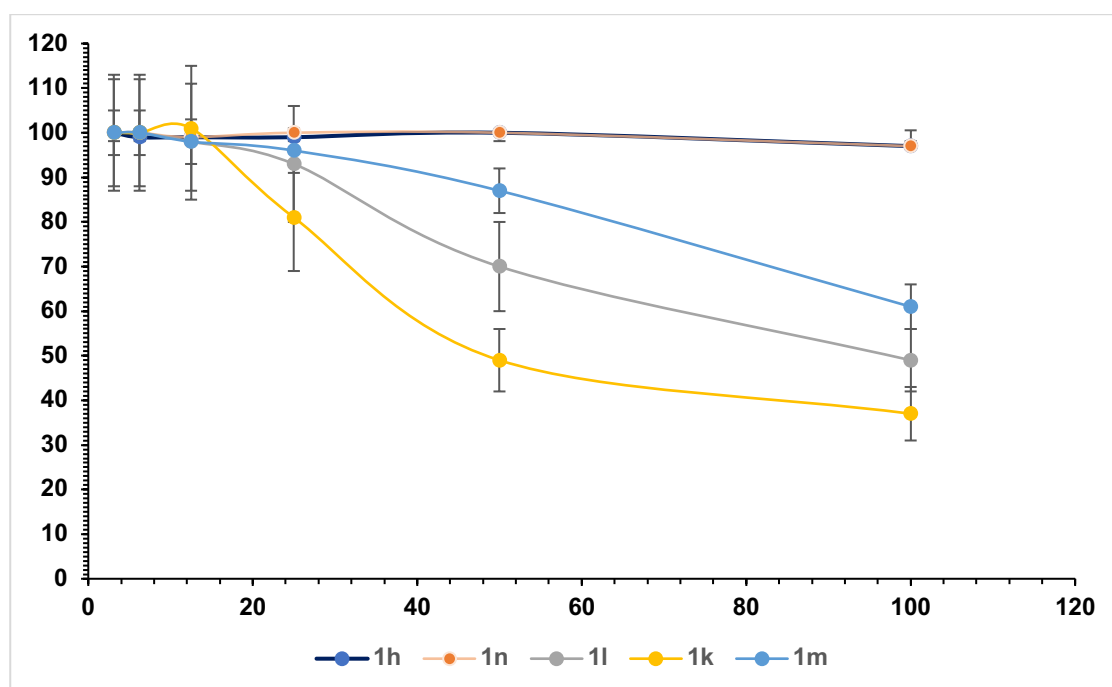

**Figure S1:** Percentage of viability of tested compounds  $\pm$  SEM

CC<sub>50</sub> were determined by curve-fitting.

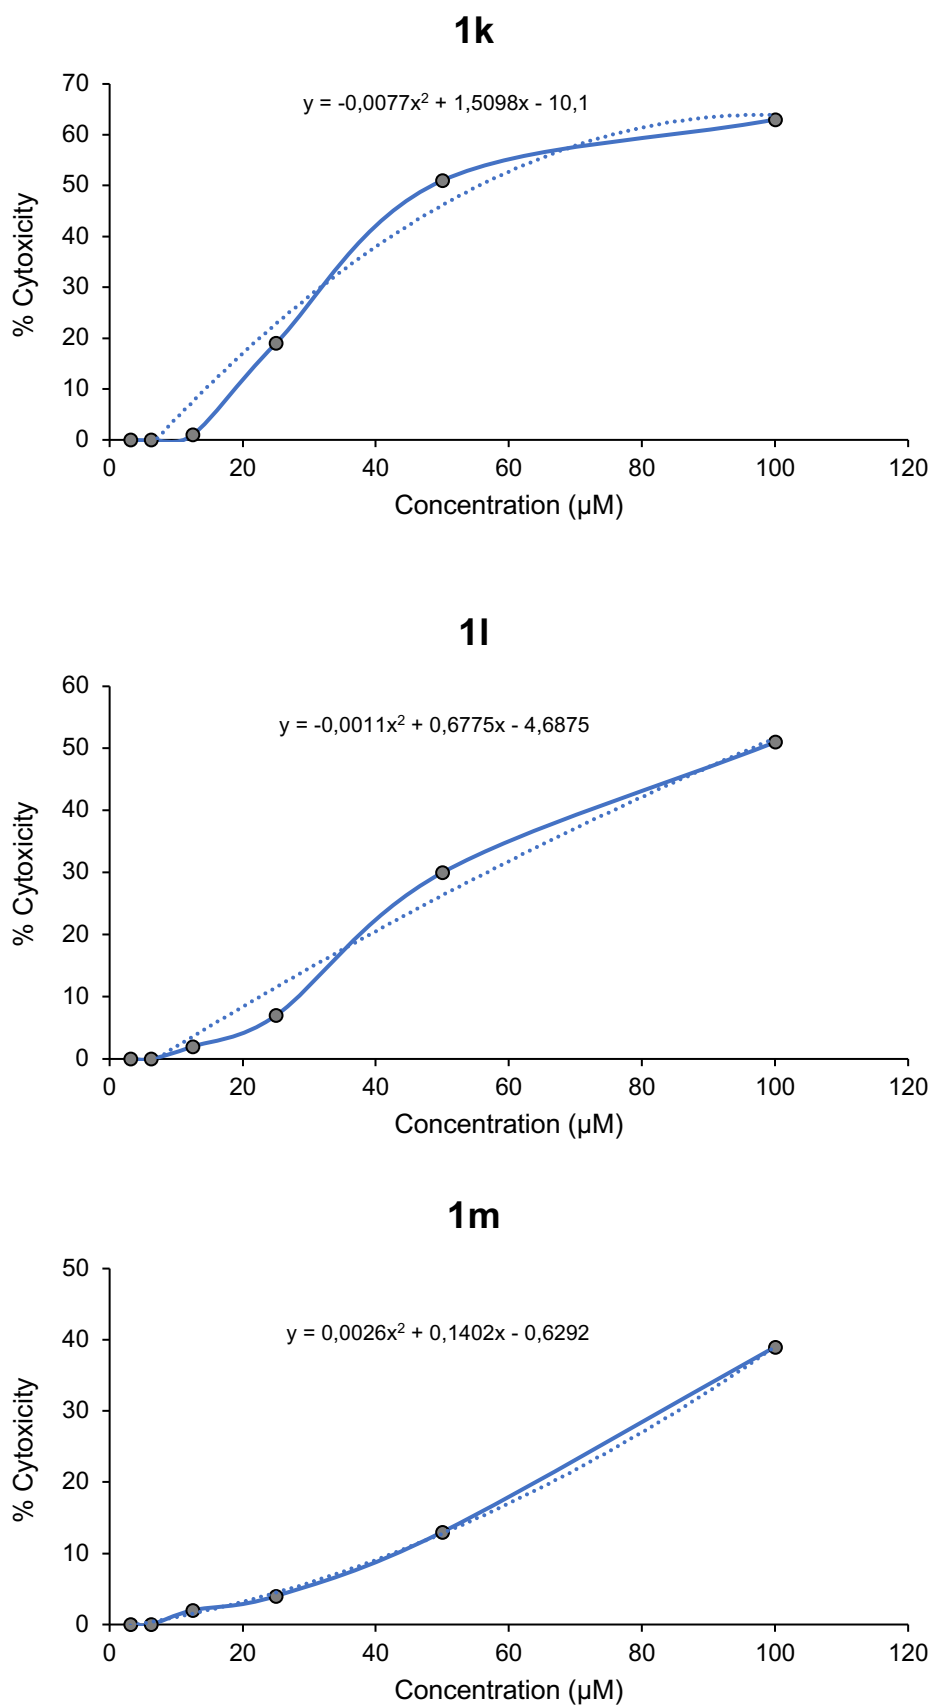

**Figure S2-S4:** CC<sub>50</sub> curves for compounds **1k-m**.

**Table S2:**  $CC_{50}$  ( $\mu M$ ) of tested compounds **1h**, **1k–n** in SH-SY5Y cell line.

| Cmpd      | $CC_{50}$ ( $\mu M$ )  |
|-----------|------------------------|
| <b>1h</b> | Not observed up to 100 |
| <b>1k</b> | $50 \pm 6$             |
| <b>1l</b> | $100 \pm 12$           |
| <b>1m</b> | $128 \pm 16$           |
| <b>1n</b> | Not observed up to 100 |
